# Supplementary material for: Novel Schiff base-functionalized metal–organic framework nanoparticles for dispersive solid phase extraction of copper ions from vegetable and water samples
Source: Royal Society of Chemistry journal article supplement (doi:10.1039/c9ay00304e), 2019-01-01
Supplement: c9ay00304e1.pdf [file c9ay00304e1.pdf]

## Supporting Information

### **Novel Schiff base-functionalized metal-organic frameworks nanoparticles for dispersive solid phase extraction of copper ions from vegetable and water samples**

Mohammadreza Mohammadi Nilash, Alireza Hashemzadeh, Ali Reza Fakhari\*, Mostafa M.  
Amini

*Faculty of Chemistry, Shahid Beheshti University, G.C., P.O. Box 1983963113, Tehran, I.R. Iran.*

**Correspondence:** Professor Ali Reza Fakhari, Faculty of Chemistry, Shahid Beheshti University,

G. C., P.O. Box 1983963113, Evin, Tehran, Iran

**Tel & Fax:** +98 (21) 22431683

**E-mail:** [a-zavareh@sbu.ac.ir](mailto:a-zavareh@sbu.ac.ir)

N'-(2-Hydroxybenzylidene)isonicotinohydrazide: Mp 241 (lit 240–242 °C). IR 3182, 2995, 1680, 1677, 1613, 1571. <sup>1</sup>HNMR (300 MHz, DMSO-d<sub>6</sub>) δ = 6.92 (m, 2H), 7.31 (m, 1H), 7.60 (d, J = 7.80 Hz, 1H), 7.84 (d, J = 4.8 Hz, 2H), 8.67 (s, 1H), 8.80 (d, J = 4.2 Hz, 2H), 11.07 (s, 1H), 12.30 (s, 1H).

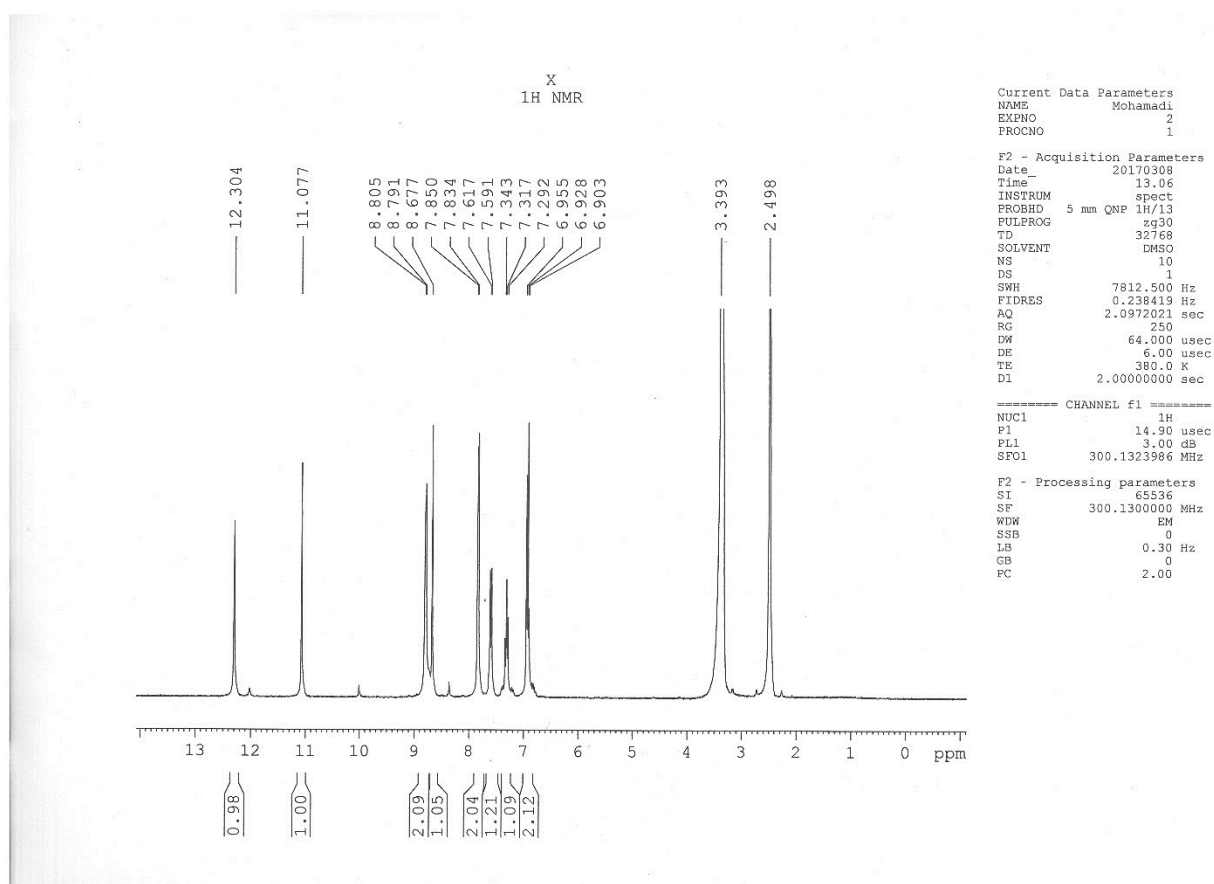

<sup>1</sup>HNMR of Schiff base ligand

**Table S1.** Effect of elution conditions

| Experiment number | [HCl] molL <sup>-1</sup> | V <sub>HCl</sub> mL | Recovery% |
|-------------------|--------------------------|---------------------|-----------|
| 1                 | 0.5                      | 2                   | 41.3      |
| 2                 | 1                        | 2                   | 92.5      |
| 3                 | 1.5                      | 2                   | 92.8      |
| 4                 | 2                        | 2                   | 93.3      |
| 5                 | 1                        | 1                   | 54.3      |
| 6                 | 1                        | 1.5                 | 68.7      |
| 7                 | 1                        | 2                   | 92.3      |
| 8                 | 1                        | 3                   | 94.3      |

**Table S2.** Effect of co-existing ions

| Co-existing ions | Concentration <sup>a</sup><br>mg L <sup>-1</sup> | Recovery<br>% |
|------------------|--------------------------------------------------|---------------|
| Na <sup>+</sup>  | 2000                                             | 96.7          |
| K <sup>+</sup>   | 1000                                             | 96.1          |
| Ca <sup>2+</sup> | 500                                              | 97.3          |
| Mg <sup>2+</sup> | 500                                              | 95.1          |
| Ba <sup>2+</sup> | 200                                              | 96.8          |
| Mn <sup>2+</sup> | 10                                               | 95.3          |
| Pb <sup>2+</sup> | 10                                               | 95.1          |
| Fe <sup>+2</sup> | 50                                               | 80.2          |
| Zn <sup>+2</sup> | 50                                               | 94.6          |
| Co <sup>2+</sup> | 10                                               | 96.1          |
| Cr <sup>+3</sup> | 10                                               | 97.4          |

The concentration of Cu(II) was 50 ng mL<sup>-1</sup>

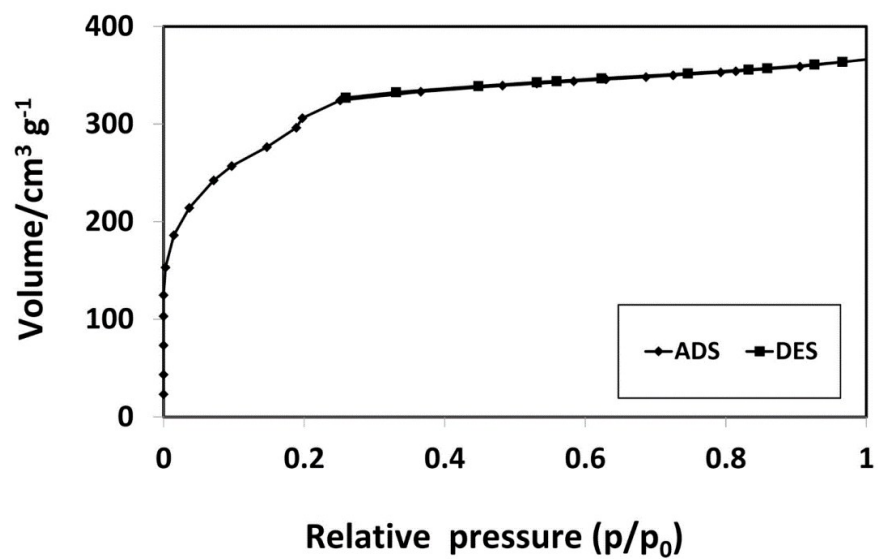

**Fig. S1.** The BET surface of the ligand@MIL-101(Cr).

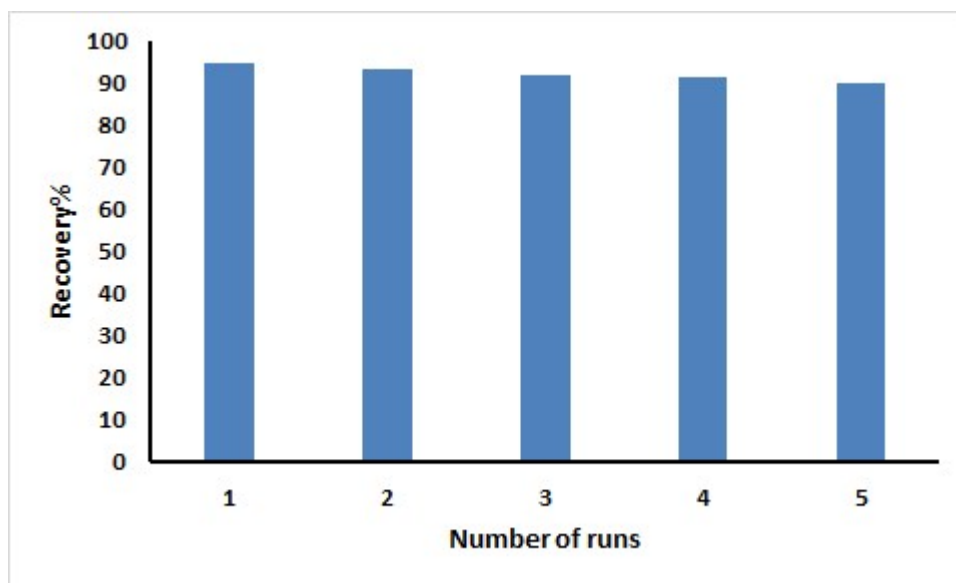

**Fig. S2.** Reusability of ligand@MIL-101(Cr) NPs in extraction of Cu(II).
